# Supplementary material for: COMPOSITUM 1 contributes to the architectural simplification of barley inflorescence via meristem identity signals
Source: PubMed Central journal article supplement (PMC7550572; doi:10.1038/s41467-020-18890-y), 2020-10-12
Supplement: 41467_2020_18890_MOESM4_ESM.pdf [file 41467_2020_18890_MOESM4_ESM.pdf]

### **Description of Additional Supplementary Files**

File name: Supplementary Data 1

Description: List of the primers

File name: Supplementary Data 2

Description: Genotypic and phenotypic data of the F3 progenies

File name: Supplementary Data 3

Description: List of the TILLING as well as induced mutants per corresponding species
